# Supplementary material for: Self-assembly of a neutral luminescent Au12 cluster with D2 symmetry
Source: Royal Society of Chemistry journal article supplement (doi:10.1039/b808646j), 2008-01-01
Supplement: b808646j.pdf [file b808646j.pdf]

## Supporting Information for

### Self-assembly of a neutral luminescent Au<sub>12</sub> cluster with D<sub>2</sub> symmetry

Qing-Fu Sun,<sup>a</sup> Terence Kwok-Ming Lee,<sup>b</sup> Pei-Zhou Li,<sup>a</sup> Liao-Yuan Yao,<sup>a</sup> Jing-Jing Huang,<sup>a</sup> Jing Huang,<sup>a</sup> Shu-Yan Yu,<sup>\*a</sup> Yi-Zhi Li,<sup>c</sup> Eddie Chung-Chin Cheng<sup>b</sup> and Vivian Wing-Wah Yam<sup>\*b</sup>

<sup>a</sup> Laboratory for Self-Assembly Chemistry, Department of Chemistry, Renmin University of China, Beijing, 100872, China. Fax: (+8610) 62516614; Tel: (+8610) 62516614; E-mail: yusy@chem.ruc.edu.cn.

<sup>b</sup> Centre for Carbon-Rich Molecular and Nano-Scale Metal-Based Materials Research, Department of Chemistry and HKU-CAS Joint Laboratory on New Materials, The University of Hong Kong, Pokfulam Road, Hong Kong, China. Fax: (+852) 28571586; Tel: (+852) 28592153; E-mail: wwyam@hku.hk.

<sup>c</sup> State Key Laboratory of Coordination Chemistry, Coordination Chemistry Institute, Nanjing University, Nanjing, 200093, China.

\*To whom correspondence should be addressed. E-Mail: yusy@chem.ruc.edu.cn (S.Y.Y.); wwyam@hku.hk (V.W.W.Y.).

#### **This PDF file includes:**

Texts S1 to S3

Figures S1 to S3

Table S1

Text S1. Experimental Details

Text S2. X-Ray Method

Text S3. Photophysical Measurements and Instrumentation

Figure S1. <sup>1</sup>H NMR of Au<sub>12</sub> in CDCl<sub>3</sub>

Figure S2. <sup>1</sup>H-<sup>1</sup>H COSY of Au<sub>12</sub> in CDCl<sub>3</sub>

Figure S3. MALDI-TOF-MS of Au<sub>12</sub>

Table S1. Crystal Data and Details of the Structure Determination for Au<sub>12</sub>

### Text S1. Experimental Details.

The Au<sub>12</sub> cluster was synthesized as shown in Scheme S1:

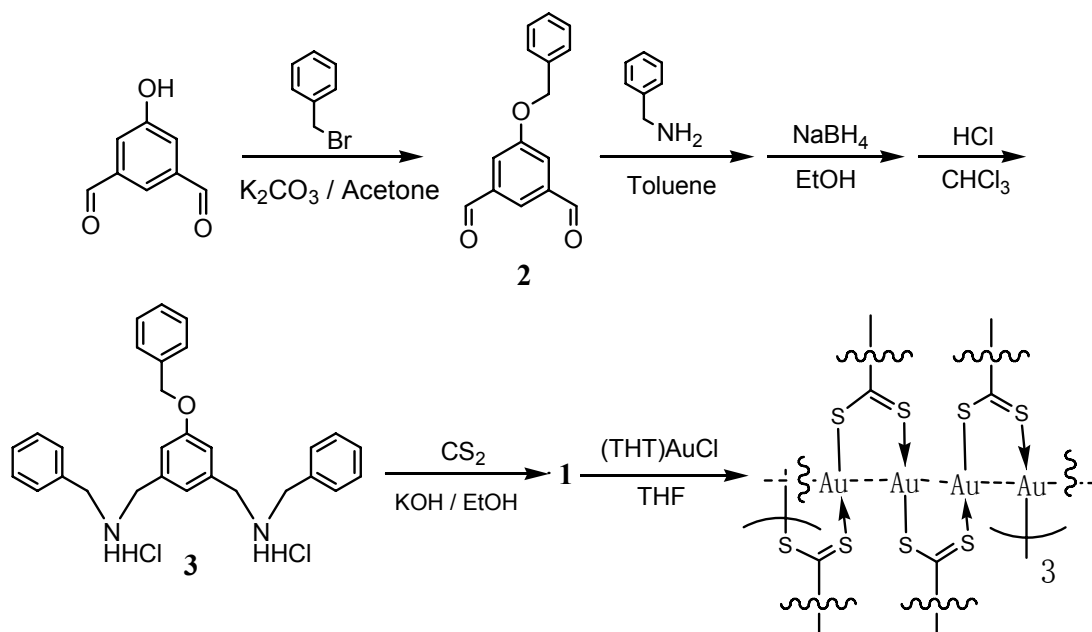

**Scheme S1.** Synthetic route to the Au<sub>12</sub> cluster.

5-Hydroxyisophthalaldehyde was synthesized according to a literature method (1) in nearly quantitative yield. (<sup>1</sup>H NMR, 400 MHz, CDCl<sub>3</sub>: δ 10.03 (s, 2H, -Ar-CHO), 8.01 (s, 1H, -Ar-OH), 7.91 (s, 1H, Ar-H<sub>2</sub>), 7.69 (s, 2H, -Ar-H<sub>4,6</sub>). 5-hydroxyisophthalaldehyde was stirred with K<sub>2</sub>CO<sub>3</sub> and benzyl bromide in acetone to give **2** (81%) (<sup>1</sup>H NMR, 400 MHz, CDCl<sub>3</sub>: δ 10.03 (s, 2H, -CHO), 7.96 (s, 1H, Ar-H), 7.72 (s, 2H, Ar-H), 7.46-7.34 (m, 5H, -CH<sub>2</sub>-Ar-H), 5.28 (d, 2H, Ar-CH<sub>2</sub>). The condensation reaction was carried out in a refluxing toluene solution of **2** and phenylmethanamine. The given Schiff base was instantly reduced by NaBH<sub>4</sub> in ethanol to afford the secondary amine, which was further purified by transforming to its HCl salt in chloroform and recrystallized in a mixture of chloroform and ethanol to give **3** as a white powder (65%). (<sup>1</sup>H NMR, 400 MHz, DMSO-d<sub>6</sub>: δ 9.84 (b, 4H, -NH<sub>2</sub>Cl), 7.57-7.20 (m, 18H, -Ar-H), 5.14 (s, 2H, -O-CH<sub>2</sub>-), 4.13-4.10 (m, 8H, -N-CH<sub>2</sub>-)).

Due to the instability of the dithiocarbamate ligand, the self-assembly process was carried out in a one-pot reaction. A slight excess of CS<sub>2</sub> was added to a solution of **3** and KOH in ethanol, and the reaction was subjected to vigorous stirring for 30 minutes. This solution of ligand **1** was then immediately used for the self-assembly process after evaporation of the excess CS<sub>2</sub>. Addition of (THT)AuCl (THT = tetrahydrothiophene) in dichloromethane to a solution of 0.5 mol equiv. of **1** in ethanol at room temperature resulted in the formation of a yellow precipitate. Evaporation of the reaction mixture followed by flash chromatography of the residue with chloroform as the eluent gave the titled product as a yellow solid in 90% yield. (Anal. Calcd for C<sub>186</sub>H<sub>168</sub>Au<sub>12</sub>N<sub>12</sub>O<sub>6</sub>S<sub>24</sub> (5800.56): C, 38.51; H, 2.92; N, 2.90. Found: C, 38.21; H, 3.08; N, 2.98).

### Text S2. X-Ray Method.

X-Ray diffraction measurements for the Au<sub>12</sub> were carried out at 291 K on a Bruker Smart Apex II CCD area detector equipped with a graphite monochromated MoK $\alpha$  radiation ( $\lambda = 0.71073$  Å). The absorption correction was performed using SADABS. The structures were solved by direct method and refined employing full-matrix least-squares on F<sup>2</sup> by using SHELXTL (Bruker, 2000) program and expanded using Fourier techniques. All non-H atoms of the complexes were refined with anisotropic thermal parameters. The hydrogen atoms were included in calculated positions. Crystal data and details of the structure determination for Au<sub>12</sub> are summarized in Table S1.

**Text S3. Photophysical Measurements and Instrumentation.**

The electronic absorption spectra were recorded on a Hewlett–Packard 8452A diode array spectrophotometer. The solid-state photophysical measurements at 77 K were carried out with the solid sample loaded in a quartz tube inside a quartz-walled Dewar flask filled with liquid nitrogen and the steady-state emission spectra were recorded on a Spex Fluorolog-3 Model FL3–211 fluorescence spectrofluorometer. Luminescence lifetime measurements were performed using a conventional laser system. The excitation source was the 355 nm output (third harmonic) of a Spectra-Physics Quanta-Ray Q-switched GCR-150-10 pulsed Nd-YAG laser. The luminescence decay signals from a Hamamatsu R928 PMT were converted to voltage changes by connecting to a 50  $\Omega$  load resistor and were then recorded on a Tektronix Model TDS-620A digital oscilloscope. The lifetime  $\tau$  was determined by a single exponential fitting of the luminescence decay trace with the relationship  $I = I_0 \exp(-t/\tau)$ , where  $I$  and  $I_0$  are the luminescence intensity at time =  $t$  and 0, respectively.

**Figure S1.**  $^1\text{H}$  NMR of  $\text{Au}_{12}$  in  $\text{CDCl}_3$

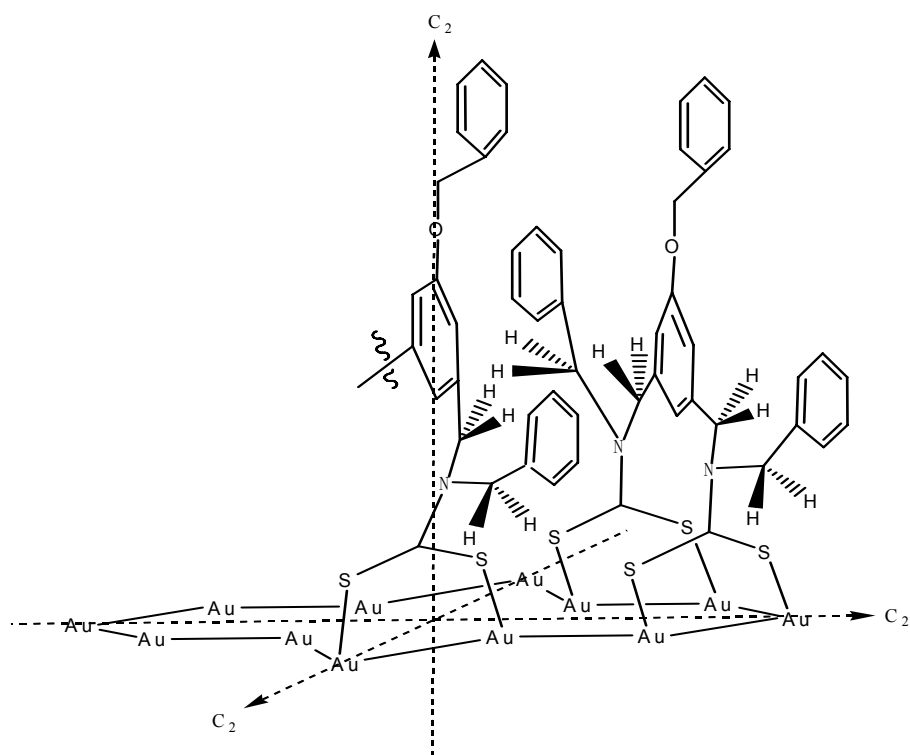

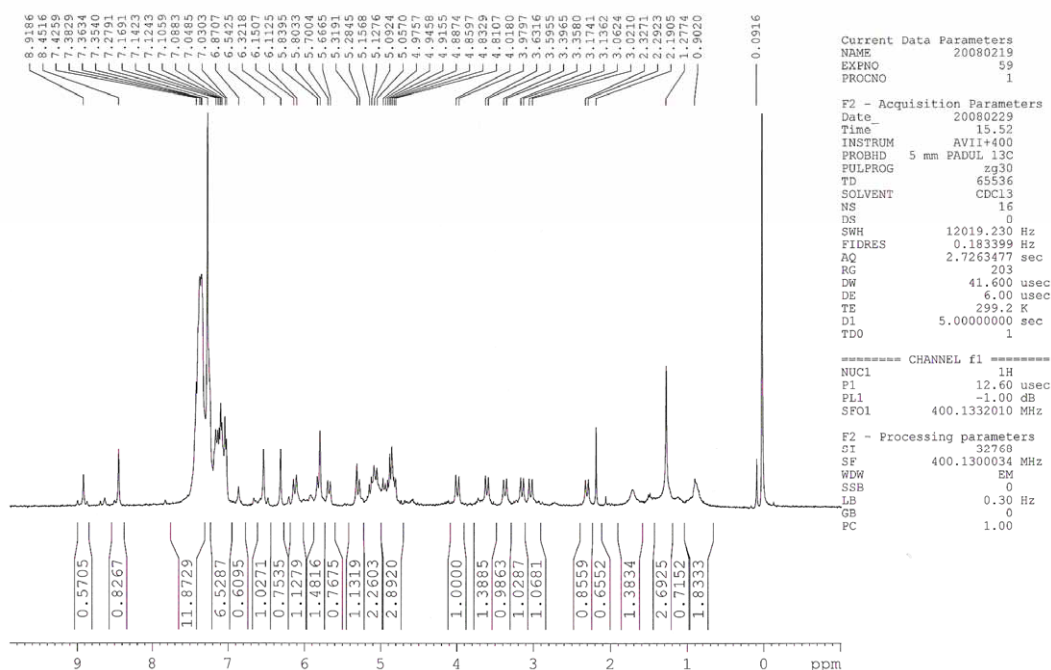

$^1\text{H}$  NMR, 400 MHz,  $\text{CDCl}_3$ :  $\delta$  8.92 (s, 2H, -O-Ar-H), 8.45 (s, 4H, -O-Ar-H), 7.43-7.03 (m, 80H, - $\text{CH}_2$ -Ar-H), 6.87 (s, 2H, -O-Ar-H), 6.54 (s, 4H, -O-Ar-H), 6.32 (s, 4H, -O-Ar-H), 6.15 (d, 4H, -Ar- $\text{CH}_2$ -N-), 5.83 (d, 4H, -Ar- $\text{CH}_2$ -N-), 5.80 (s, 2H, -O-Ar-H), 5.70 (d, 4H, -Ar- $\text{CH}_2$ -N-), 5.31 (d, 4H, -N- $\text{CH}_2$ -Ar), 5.16 (d, 4H, -N- $\text{CH}_2$ -Ar), 4.85 (d, 4H, -N- $\text{CH}_2$ -Ar), 4.98-4.81 (m, 12H, -O- $\text{CH}_2$ -Ar), 4.02 (d, 4H, -Ar- $\text{CH}_2$ -N-), 3.63 (d, 4H, -Ar- $\text{CH}_2$ -N-), 3.40 (d, 4H, -N- $\text{CH}_2$ -Ar), 3.17 (d, 4H, -N- $\text{CH}_2$ -Ar), 3.06 (d, 4H, -N- $\text{CH}_2$ -Ar), 2.32 (d, 4H, -Ar- $\text{CH}_2$ -N-)

Figure S2.  $^1\text{H}$ - $^1\text{H}$  COSY of  $\text{Au}_{12}$  in  $\text{CDCl}_3$

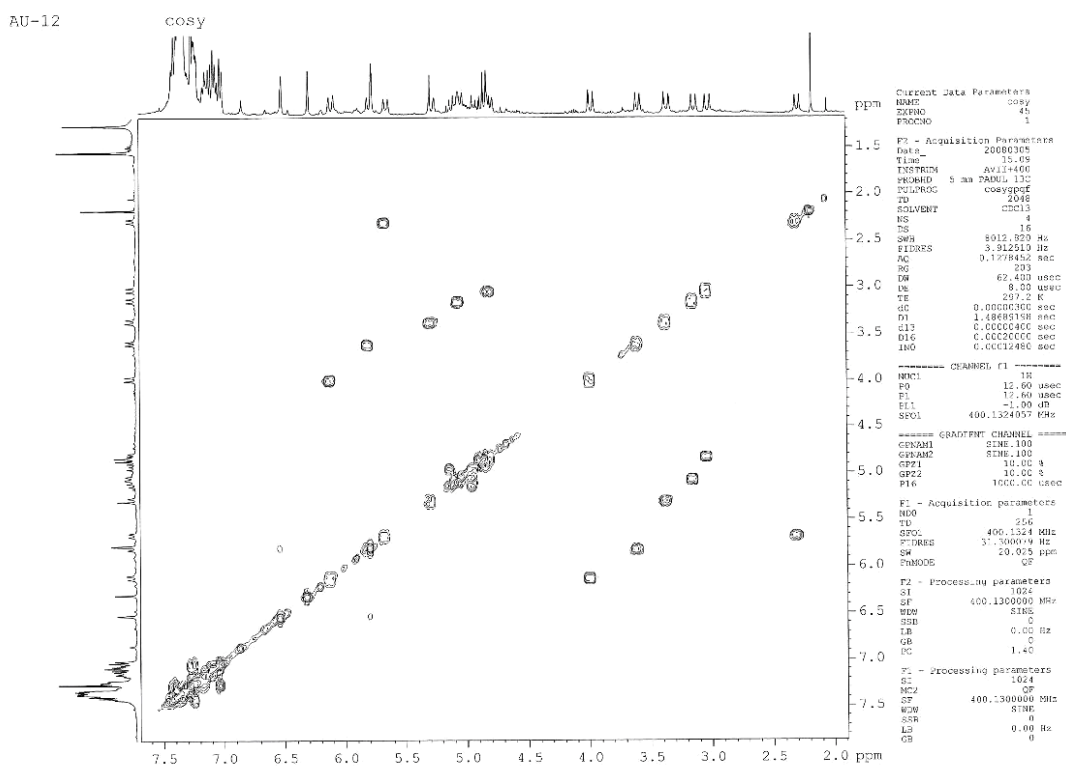

Figure S3. MALDI-TOF-MS of Au<sub>12</sub>

D:\Data\_IC\2007\07-09\20070913\200709130110\_F21

printed: 9/13/2007 10:01:17 AM

### MALDI-TOF,DHB,2007,09,13

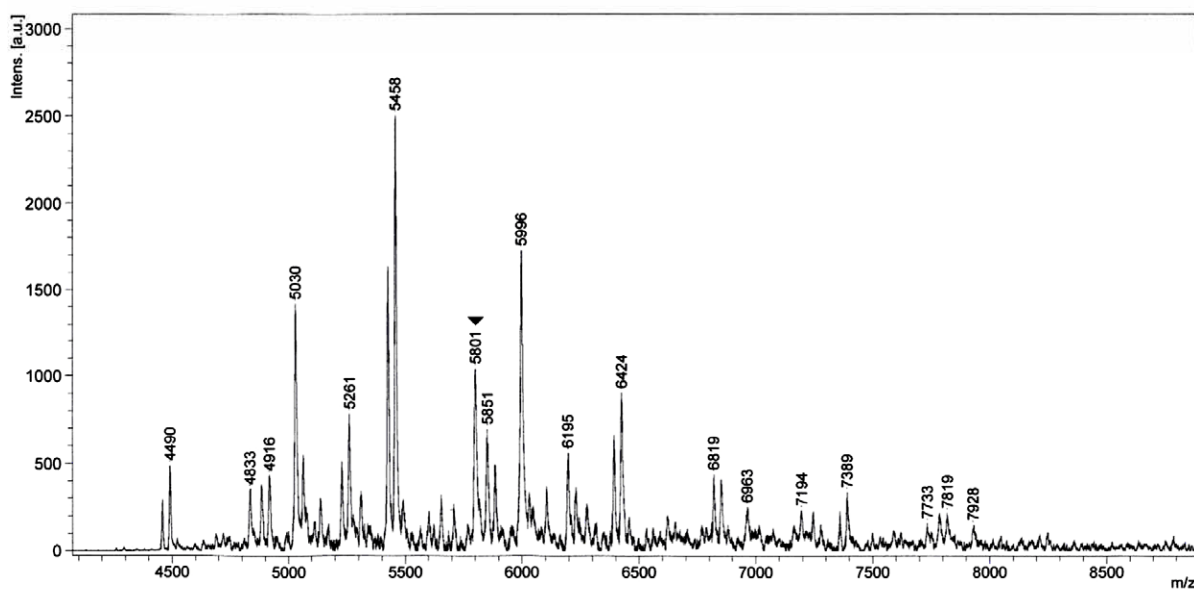

Linear Model:  $m/z$  5801 [Au<sub>12</sub>L<sub>6</sub>]; 5996 [Au<sub>13</sub>L<sub>6</sub>]; 6195 [Au<sub>14</sub>L<sub>6</sub>]; 6393 [Au<sub>15</sub>L<sub>6</sub>]. Some of the remaining fragment peaks were tentatively assigned:  $m/z$  5030 [Au<sub>8</sub>L<sub>6</sub> + H<sub>2</sub>O]; 5229 [Au<sub>9</sub>L<sub>6</sub> + H<sub>2</sub>O]; 5261 [Au<sub>9</sub>L<sub>6</sub> + S + H<sub>2</sub>O]; 5426 [Au<sub>10</sub>L<sub>6</sub> + H<sub>2</sub>O]; 5458 [Au<sub>10</sub>L<sub>6</sub> + S + H<sub>2</sub>O]; 5851 [Au<sub>12</sub>L<sub>6</sub> + S + H<sub>2</sub>O]; 5884 [Au<sub>12</sub>L<sub>6</sub> + 2S + H<sub>2</sub>O]; 6424 [Au<sub>15</sub>L<sub>6</sub> + S]; 6819 [Au<sub>17</sub>L<sub>6</sub> + S].

**Table S1. Crystal Data and Details of the Structure Determination for Au<sub>12</sub>**

|                                   |                                                                                                                                            |
|-----------------------------------|--------------------------------------------------------------------------------------------------------------------------------------------|
| Formula                           | C <sub>186</sub> H <sub>168</sub> Au <sub>12</sub> N <sub>12</sub> O <sub>6</sub> S <sub>24</sub> , 3CHCl <sub>3</sub> , 7H <sub>2</sub> O |
| Formula Weight                    | 6284.58                                                                                                                                    |
| Crystal System                    | Triclinic                                                                                                                                  |
| Space group                       | P-1 (No. 2)                                                                                                                                |
| Unit cell dimensions              | a = 18.3910(9) Å, alpha=84.629(2) °<br>b = 21.5894(11) Å, beta=82.1110(18) °<br>c = 28.2586(14) Å, gamma=88.706(2) °                       |
| Volume                            | 11064.6(10) Å <sup>3</sup>                                                                                                                 |
| Z                                 | 2                                                                                                                                          |
| Density (calculated)              | 1.886 g cm <sup>-3</sup>                                                                                                                   |
| F(000)                            | 5984                                                                                                                                       |
| Crystal Size                      | 0.20 x 0.18 x 0.15 mm <sup>3</sup>                                                                                                         |
| Temperature                       | 291(2) K                                                                                                                                   |
| Theta range for data collection   | 0.95-26.0                                                                                                                                  |
| Index ranges                      | -20 ≤ h ≤ 22, -22 ≤ k ≤ 26, -34 ≤ l ≤ 27                                                                                                   |
| Reflections collected             | 119200                                                                                                                                     |
| Independent reflections           | 42914 [R(int) = 0.0386]                                                                                                                    |
| Completeness to theta = 26.0°     | 98.6%                                                                                                                                      |
| Absorption correction             | Semi-empirical from equivalents                                                                                                            |
| Refinement method                 | Full-matrix least-squares on F <sub>2</sub>                                                                                                |
| Data / restraints / parameters    | 42914 / 0 / 2395                                                                                                                           |
| Goodness-of-fit on F <sup>2</sup> | 1.039                                                                                                                                      |
| Final R indices [I > 2sigma(I)]   | R1 = 0.0487, wR2 = 0.1069                                                                                                                  |
| R indices (all data)              | R1 = 0.0693, wR2 = 0.1115                                                                                                                  |
| Largest diff. peak and hole       | 0.736 and -1.563 e Å <sup>-3</sup>                                                                                                         |

(1) A. Star, Y. Liu, K. Grant, L. Ridvan, J. F. Stoddart, D. W. Steurman, M. R. Diehl, A. Boukai, and J. R. Heath.  
*Macromolecules*, 2003, **36**, 553-560.
